# Supplementary material for: A fully protected hydrogenase/polymer-based bioanode for high-performance hydrogen/glucose biofuel cells
Source: PubMed Central journal article supplement (PMC6131248; doi:10.1038/s41467-018-06106-3), 2018-09-10
Supplement: 41467_2018_6106_MOESM1_ESM.pdf [file 41467_2018_6106_MOESM1_ESM.pdf]

**Supplementary Information**

**A fully protected hydrogenase/polymer based bioanode for  
hydrogen/glucose biofuel cells**

Ruff et al.

## Supplementary Figures

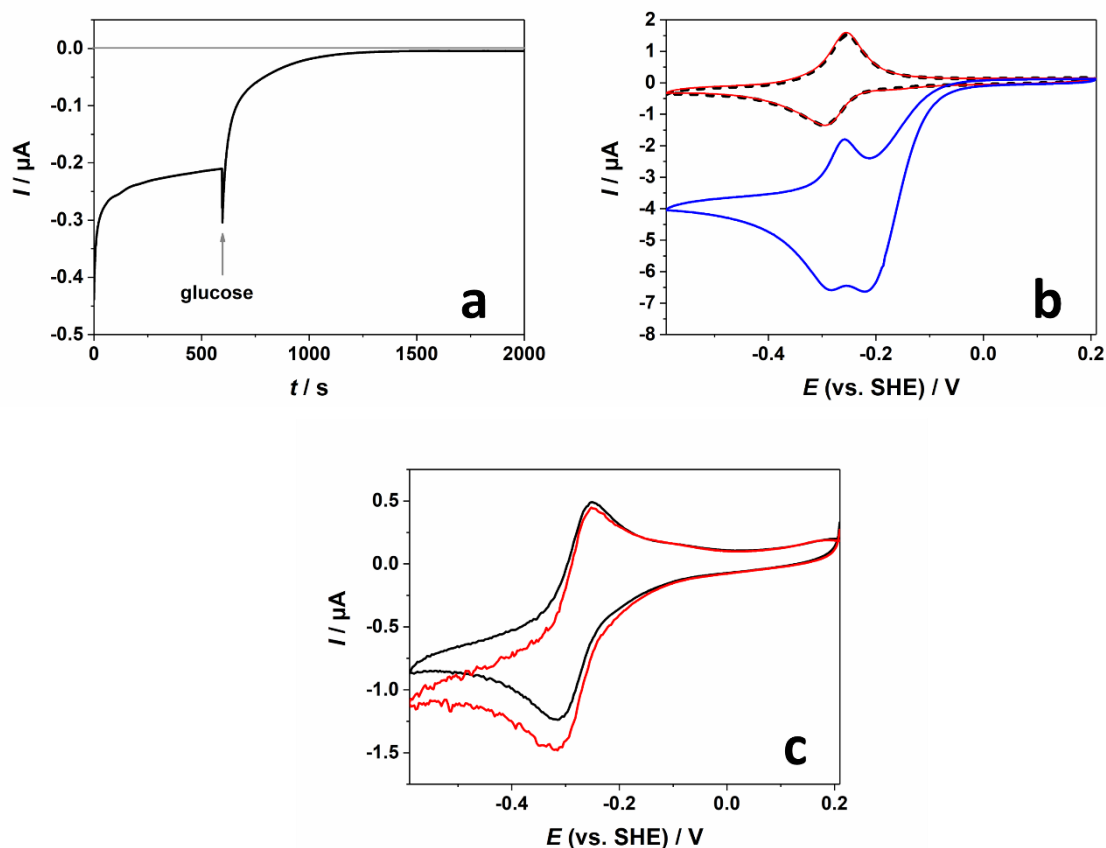

**Supplementary Figure 1:** Characteristics of the  $O_2$  removal system based on P(SS-GMA-BA)/GOx/CAT. **a:** Chronoamperometric experiment with a P(SS-GMA-BA)/GOx/CAT (2:1:1 wt%) modified Pt-electrode at an applied potential of +10 mV vs. SHE under air in quiescent solution. After the addition of glucose (50 mM) at  $t = 595$  s, the current drops to zero since the bi-enzymatic system starts to remove  $O_2$  in front of the electrode surface. **b:** Cyclic voltammograms in quiescent solution of a P(N<sub>3</sub>MA-BA-GMA)-vio//P(SS-GMA-BA)/GOx/CAT multilayer film deposited on a GC electrode under argon (black dashed line), under air without glucose in solution (blue line), and under air with glucose in solution (red line). **c:** Cyclic voltammograms of a P(N<sub>3</sub>MA-BA-GMA)-vio/DMF-[NiFe]//P(SS-GMA-BA)/GOx/CAT double-layer film on GC while purging of argon (black line) or a mixture of 5 %  $O_2$  and 95 % Ar (red line) through the electrolyte. Working electrolyte for all measurements was 0.1 M PB (pH 7.4). Scan rate: 10 mV s<sup>-1</sup>.

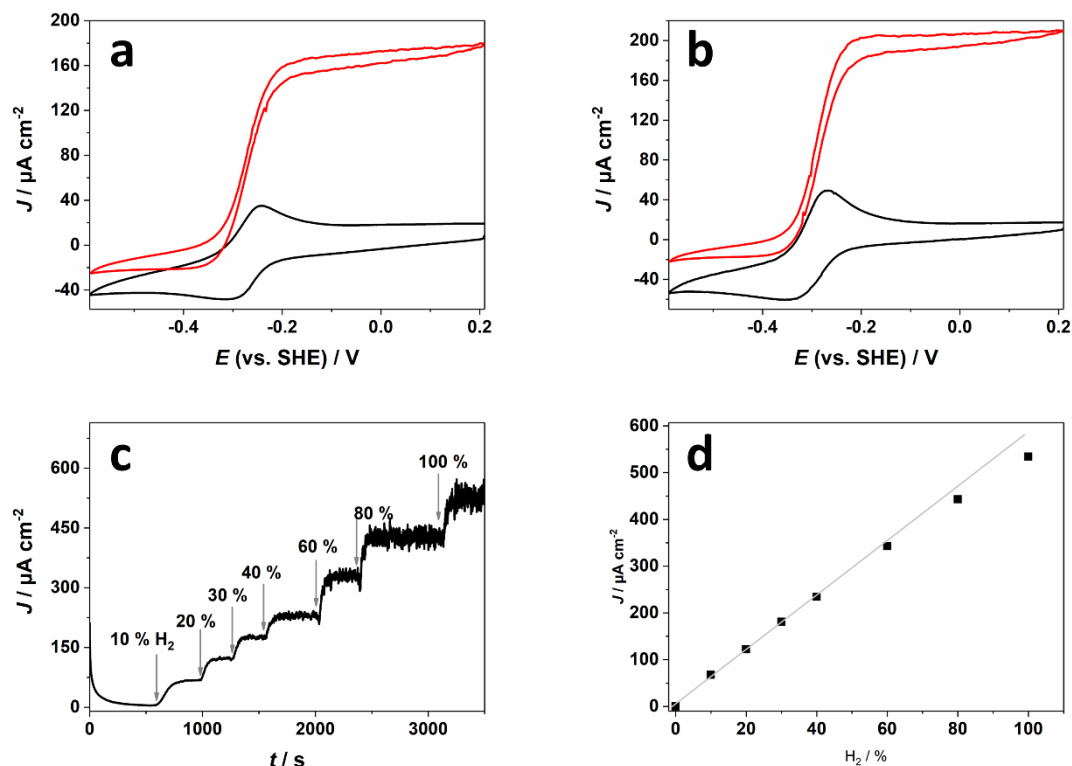

**Supplementary Figure 2:** Voltammetric (**a** and **b**) and amperometric characterization (**C**) of hydrogenase bioanodes in 0.1 M PB, pH 7.4. **a** and **b**: Cyclic voltammograms of a  $\text{P}(\text{N}_3\text{MA-BA-GMA})\text{-vio}/D\text{vH-}[\text{NiFeSe}]/\text{P}(\text{SS-GMA-BA})/\text{GOx}/\text{CAT}$  (**a**) and  $\text{P}(\text{N}_3\text{MA-BA-GMA})\text{-vio}/D\text{vMF-}[\text{NiFe}]$  (**b**) modified electrode recorded with  $10 \text{ mV s}^{-1}$  under 100 % argon (black trace) and turnover conditions (100 %  $\text{H}_2$ ), gases were purged through the electrolyte, the same hydrogenase batch was used for both experiments; **c** and **d**: Dependence of the current density  $J$  on the  $\text{H}_2$  concentration in the gas feed determined for a  $\text{P}(\text{N}_3\text{MA-BA-GMA})\text{-vio}/D\text{vH-}[\text{NiFeSe}]/\text{P}(\text{SS-GMA-BA})/\text{GOx}/\text{CAT}$  modified glassy carbon electrode. For the double-layer system,  $J$  is clearly limited by  $\text{H}_2$  mass transport. **c**: plot of  $J$  vs.  $t$  and **d**: plot of  $J$  vs.  $\text{H}_2$  content in the gas feed in % showing that a linear increase of  $J$  was observed for  $\text{H}_2$  levels below  $\approx 40$  %; chronoamperometric measurements were performed at an applied potential of +160 mV vs. SHE.

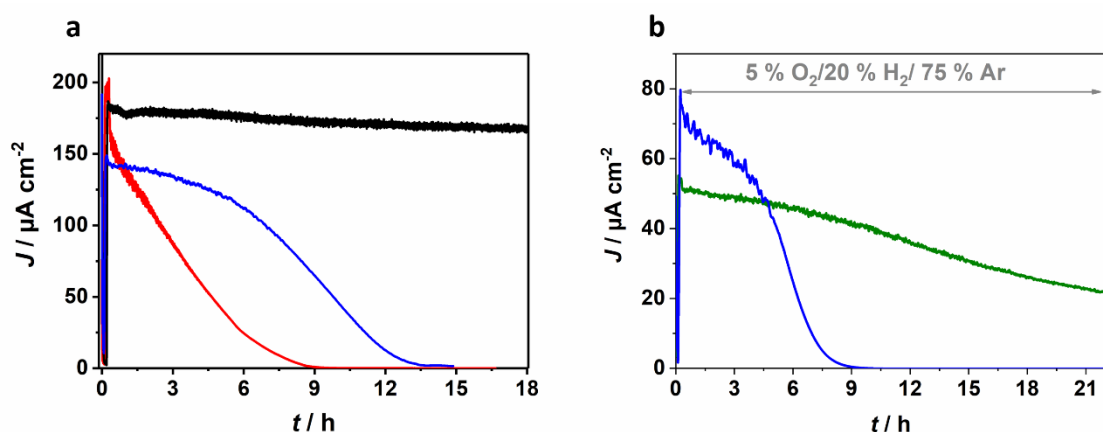

**Supplementary Figure 3:** Chronoamperometric long-term stability tests of double-layer bioanodes in 0.1 M PB, pH 7.4 at an applied potential of +160 mV vs. SHE under turnover conditions and in the presence of O<sub>2</sub>. **a:** black trace: P(N<sub>3</sub>MA-BA-GMA)-vio/DvMF-[NiFe]//P(SS-GMA-BA)/GOx/CAT system with 20 % H<sub>2</sub>/80 % Ar bubbling through the cell and in the absence of glucose; red trace: single P(N<sub>3</sub>MA-BA-GMA)-vio/DvMF-[NiFe] layer, 5 % O<sub>2</sub>/20 % H<sub>2</sub>/ 75 % Ar; blue trace: P(N<sub>3</sub>MA-BA-GMA)-vio/DvMF-[NiFe]//P(SS-GMA-BA)/GOx/CAT system with 5 % O<sub>2</sub>/20 % H<sub>2</sub>/ 75 % Ar bubbling through the cell and 100 mM glucose; the same enzyme batch was used for all three experiments. **b:** Comparison between the protection systems based on GOx (P(N<sub>3</sub>MA-BA-GMA)-vio/DvMF-[NiFe]//P(SS-GMA-BA)/GOx/CAT, green line) and Py<sub>2</sub>Ox (P(N<sub>3</sub>MA-BA-GMA)-vio/DvMF-[NiFe]//P(SS-GMA-BA)/Py<sub>2</sub>Ox/CAT, blue line) with 5 % O<sub>2</sub>/20 % H<sub>2</sub>/ 75 % Ar bubbling through the electrolyte and with 50 mM glucose in solution; the same enzyme batch was used for both measurements. Absolute current densities are shown, for normalized values see Figure 3 in the main text. Note that for the experiments depicted in **a** and **b** respectively, two different hydrogenase batches were used which explains the differences in absolute currents in **a** and **b**.

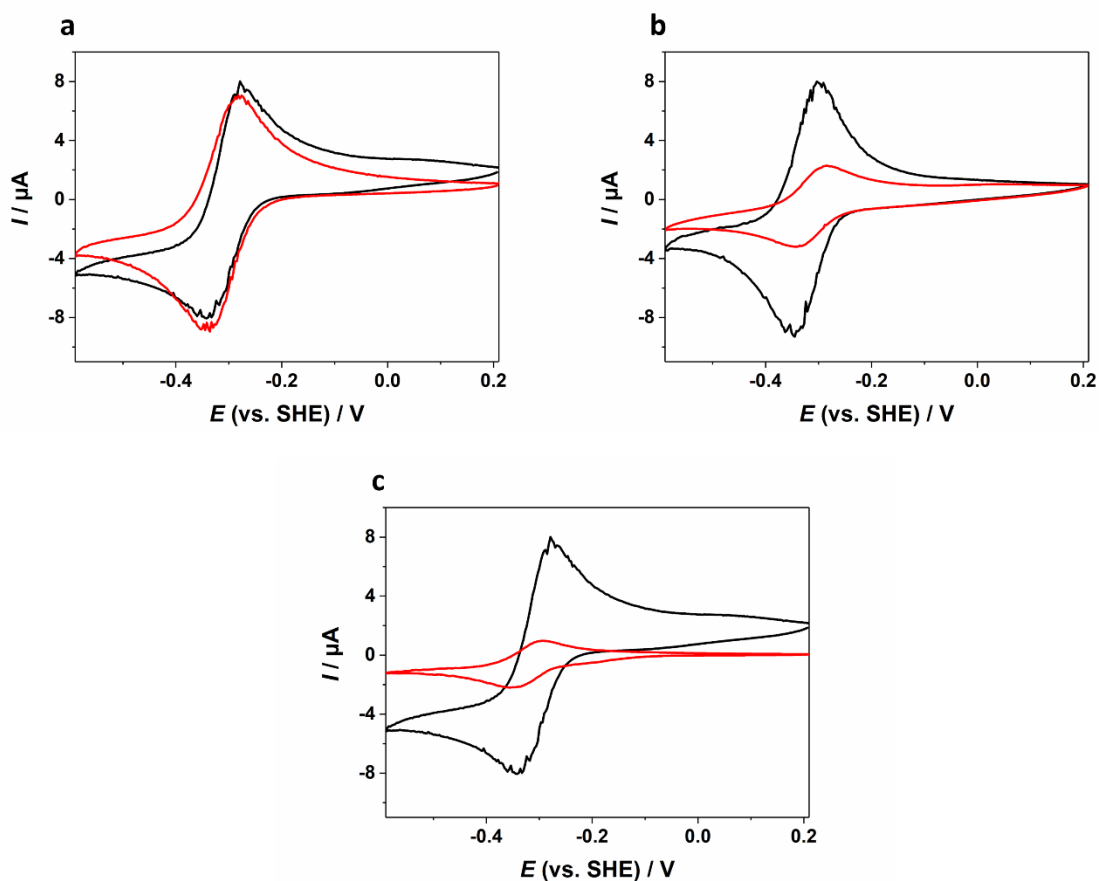

**Supplementary Figure 4:** Cyclic voltammograms of P(N<sub>3</sub>MA-BA-GMA)-*vio*/D<sub>1</sub>MF-[NiFe]/P(SS-GMA-BA)/GOx/CAT coated glassy carbon electrodes in 0.1 PB, pH 7.4 under argon with a scan rate of 10 mV s<sup>-1</sup> before (black lines) and after (red lines) the long-term measurements as shown in Figure 3A in the main text. Conditions for long-term measurements: **a:** 20 % H<sub>2</sub>/80 % Ar; **b:** 20 % H<sub>2</sub>/75 % Ar/5 % O<sub>2</sub>, the electrode was only modified with a P(N<sub>3</sub>MA-BA-GMA)-*vio*/D<sub>1</sub>MF-[NiFe] layer, the protection layer was absent; **c:** 20 % H<sub>2</sub>/75 % Ar/5 % O<sub>2</sub> and 100 mM glucose in solution.

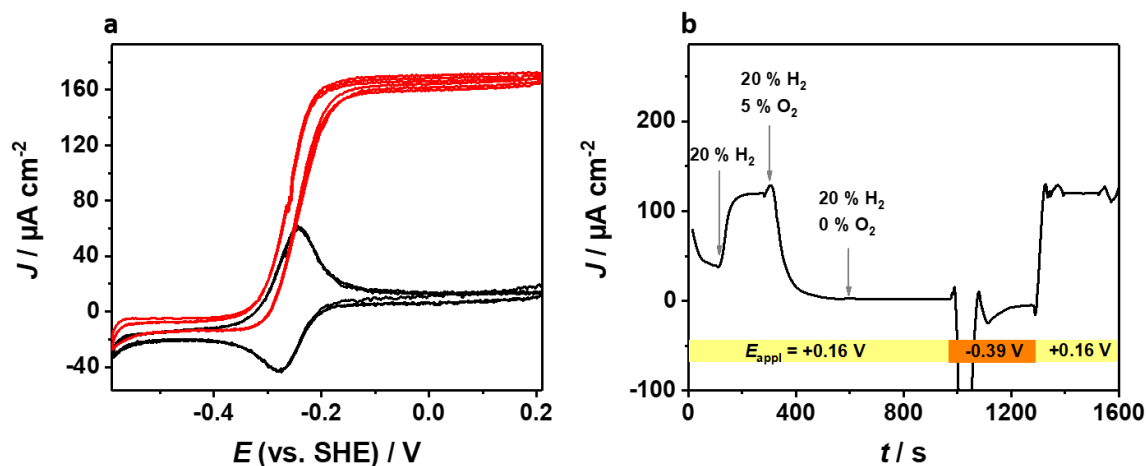

**Supplementary Figure 5:** Reactivation of *DVMF*-[NiFe] that was deactivated by  $O_2$  in electrochemically deposited  $P(N_3MA-BA-GMA)-vio/DVMF-[NiFe]$  thin films. For the deposition a pulse sequence of  $n$  ( $+1.71$  V/ $0.2$  s;  $+0.21$ V/ $2$  s) with  $n = 10$  ( $E$  vs. SHE) and an electrochemically activated crosslinker was used according to procedures described in ref. <sup>1</sup>. Experiments were conducted in  $0.1$  M phosphate buffer (pH 7.4). **a:** Cyclic voltammograms of the  $P(N_3MA-BA-GMA)-vio/DVMF-[NiFe]$  thin film under argon (black line) and  $H_2$  atmosphere (red line), three consecutive scans are shown for each case; scan rate =  $10$  mV  $s^{-1}$ . The voltammograms show that even in thin films a mediated electron transfer is present: the half wave potential of the catalytic waves matches the redox potential of the viologen-based mediator; thus, the hydrogenases are in electrical contact with the viologen units and electrons can be exchanged. **b:** Chronoamperometric experiment with different gas feeds and different applied potentials ( $E_{app}$  vs. SHE). The argon content in the gas feed was adjusted to achieve the desired composition of the  $H_2/O_2/Ar$  mixture. In thin films, the oxygen front is immediately reaching the reaction layer and deactivates the biocatalyst ( $t > 350$  s). After the  $O_2$  feed was stopped ( $t = 600$  s), the current remains at the background value, indicating that the enzyme is fully deactivated by  $O_2$ . When the polymer is reduced at an applied potential of  $-0.39$  V ( $t = 900-1300$  s), the redox mediator can reactivate the inactivated enzyme by reduction and the oxidation current was restored ( $t > 1300$  s). This effect was first observed for the *DVMH*-[NiFeSe] hydrogenase and the reader is referred to ref. <sup>1</sup> for a more detailed description of this process and thin film formation. For the *DVMF*-[NiFe] this effect was not described yet, and this is the first time that reactivation was shown for this hydrogenase.

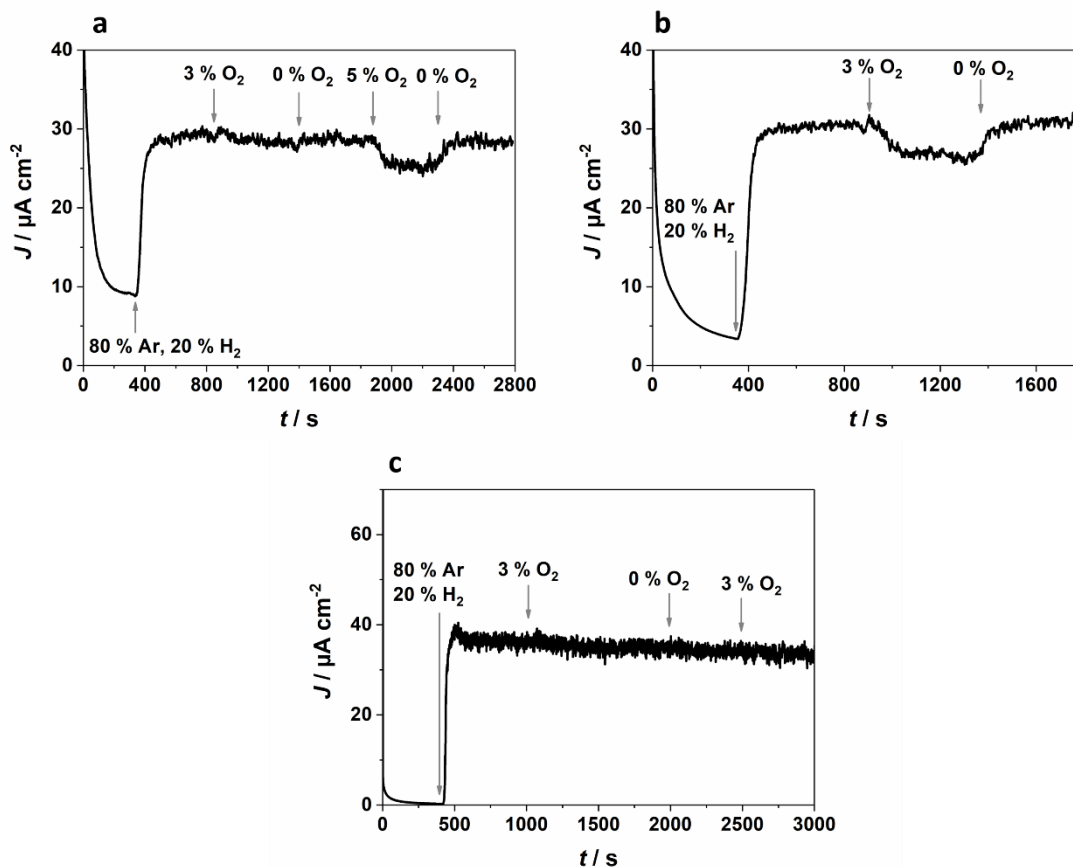

**Supplementary Figure 6:** Characterization of the P(SS-GMA-BA)/Py<sub>2</sub>Ox/CAT protection system by means of chronoamperometry in 0.1 M PB, pH 7.4 at an applied potential of +160 mV vs. SHE. **a:** Current density for a P(N<sub>3</sub>MA-BA-GMA)-vio/DvMF-[NiFe]//P(SS-GMA-BA)/Py<sub>2</sub>Ox/CAT double-layer system in the presence of different O<sub>2</sub> concentrations in the gas feed and with 50 mM glucose in solution. **b:** Current density for a P(N<sub>3</sub>MA-BA-GMA)-vio/DvMF-[NiFe]//P(SS-GMA-BA)/Py<sub>2</sub>Ox/CAT double-layer system in absence of glucose and with varying O<sub>2</sub> content in the gas feed. **c:** Current density for a P(N<sub>3</sub>MA-BA-GMA)-vio/DvMF-[NiFe]//P(SS-GMA-BA)/Py<sub>2</sub>Ox/CAT double-layer system in presence of 1 mM glucose and with alternatingly switching from 0 to 3 % O<sub>2</sub>. The Py<sub>2</sub>Ox based protection system provides a full protection for O<sub>2</sub> levels of up to 3 % even at low glucose concentration of only 1 mM.

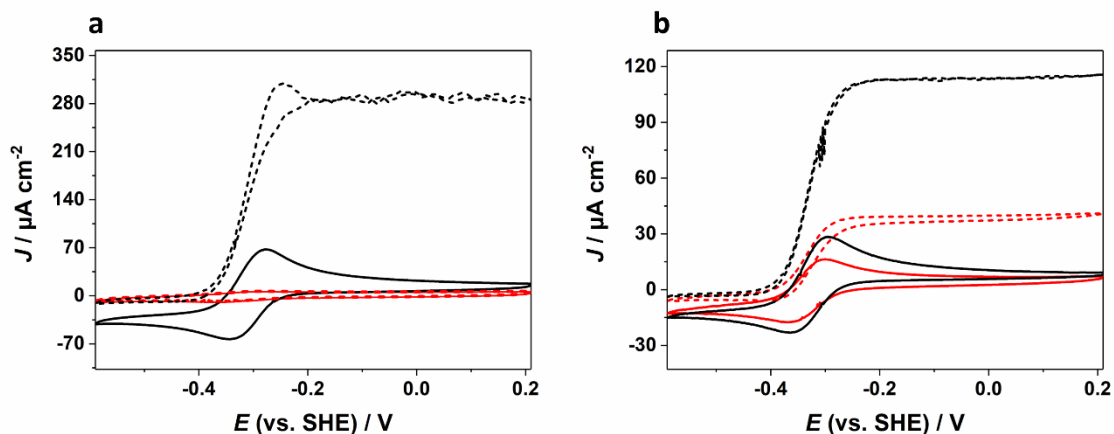

**Supplementary Figure 7:** Cyclic voltammograms of P(N<sub>3</sub>MA-BA-GMA)-vio/DvMF-[NiFe] modified electrodes covered with a GOx/CAT (a) or Py<sub>2</sub>Ox/CAT (b) protection layer measured before (black lines) or after (red lines) long-term measurements as depicted in Figure 3B in the main text under 100 % argon (solid lines) and under 100 % H<sub>2</sub> (dashed lines). Working electrolyte: 0.1 M PB, pH 7.4; scan rates for all measurements: 10 mV s<sup>-1</sup>. Note that after the long-term measurement using the GOx/CAT protection system, no catalytic response was observed under turnover conditions (dashed red line in a) indicating that the hydrogenase was deactivated within the timescale of the long-term experiment. For voltammetry after the long-term experiments the electrodes were transferred into a fresh electrolyte solution to ensure identical conditions for all experiments (note that for the GOx/CAT system the pH value of the electrolyte was considerably lower after the long-term experiment).

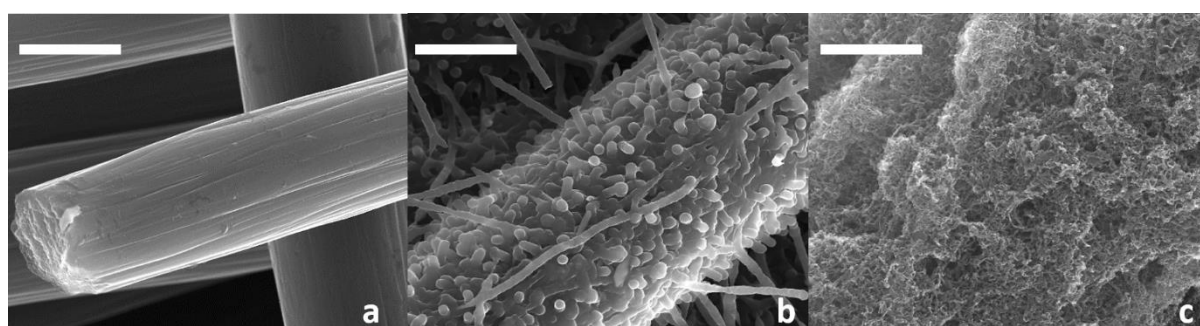

**Supplementary Figure 8:** Scanning electron micrographs of the bare carbon cloth (a), CMF modified carbon cloth (b), and CNT/CMF decorated carbon cloth (c); scale bar = 5 μm; conditions: a:) working distance = 9.2 mm, acceleration voltage = 20 kV; b: 9.6 mm, 20 kV; c: 8.8 mm, 20 kV. Scale bar = 5 μm.



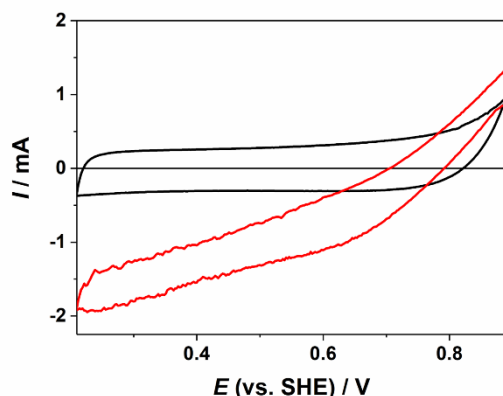

**Supplementary Figure 9:** Cyclic voltammograms of a CNT/CMF-decorated carbon cloth electrode modified with a HRP layer under Ar and in absence (black line) and presence of 2 mM H<sub>2</sub>O<sub>2</sub> (red line); scan rate = 2 mV s<sup>-1</sup>; working electrolyte = 0.1 M PB, pH 7.4.

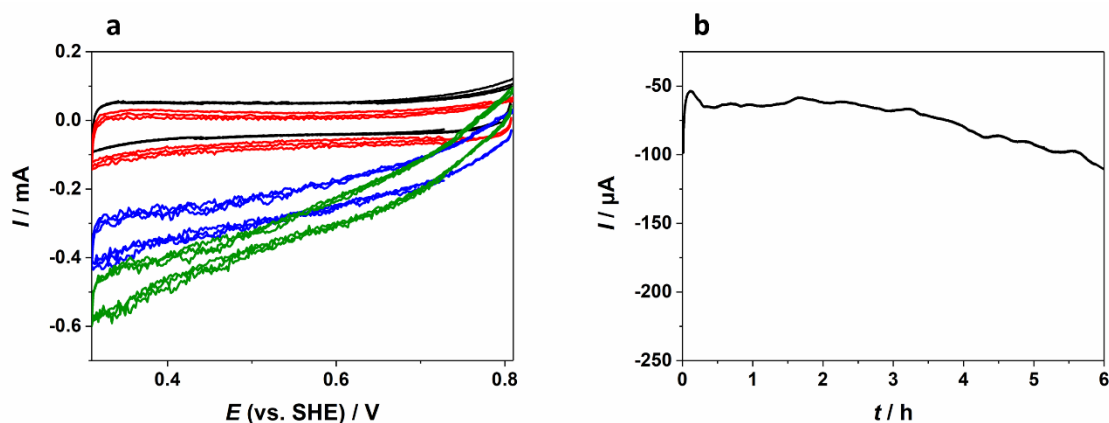

**Supplementary Figure 10:** Characterization of the GOx/HRP based biocathode. **a:** Dependency of the absolute current of a GOx/HRP modified CNT/CMF carbon cloth electrode on the glucose concentration in solution (0.1 M PB, pH 7.4); Cyclic voltammograms were recorded with a scan rate of 5 mV s<sup>-1</sup> and with 50 % Ar/50 % O<sub>2</sub> bubbling through the electrolyte; three consecutive potential cycles for each concentration; black line: 0 mM glucose, red line: 1 mM glucose, blue line: 5 mM glucose, green line: 20 mM glucose. Note that the current obtained for 20 mM is close to the currents obtained for 50 mM (Figure 4 in the main text), indicating that saturation is reached at this high glucose concentrations. **b:** chronoamperometric measurements with a GOx/HRP/P(SS-GMA-BA) modified CNT/CMF carbon cloth (the diamine 2,2'-(ethylenedioxy)diethylamine was to crosslink P(SS-GMA-BA)) electrode in 0.1 M PB (pH 7) containing 5 mM glucose with an applied potential of +0.31 V vs. SHE. Note that for the biofuel cell test an additional P(SS-GMA-BA) layer was not employed to facilitate substrate transport and hence to ensure that the bioanode is limiting. However, the stability is comparable to the system depicted in **b**: a biofuel cell test was conducted within ≈3 h.

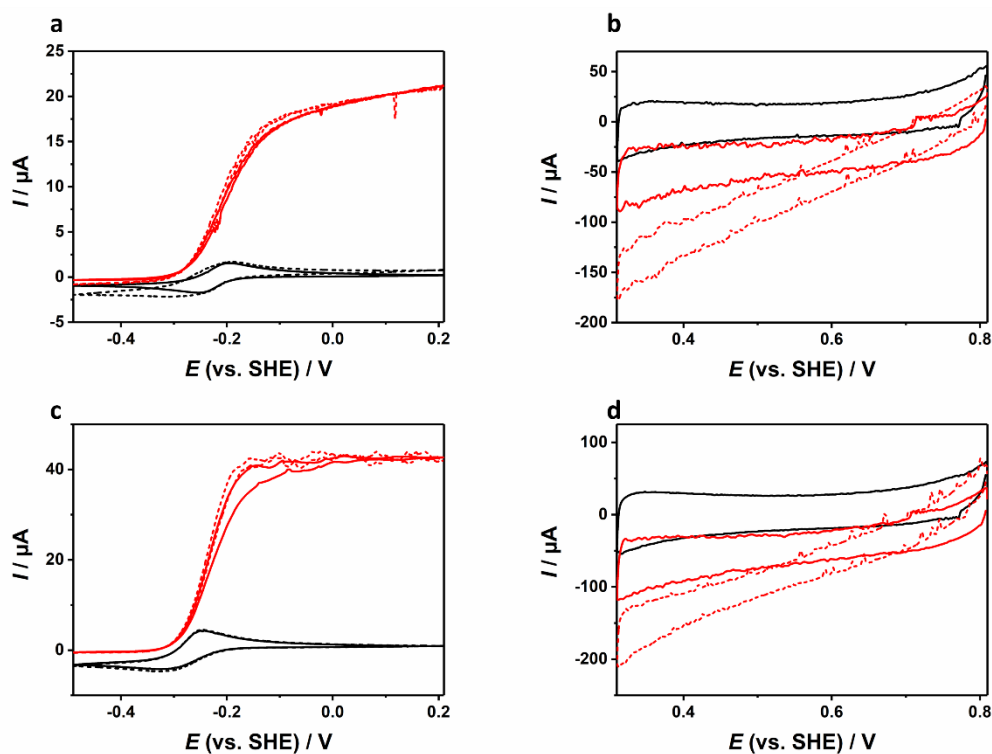

**Supplementary Figure 11:** Cyclic voltammograms recorded with P( $\text{N}_3\text{MA-BA-GMA}$ )-*vio*/ $\text{H}_2\text{ase}$ //P(SS-GMA-BA)/ $\text{Py}_2\text{Ox}$ /CAT bioanodes ( $\text{H}_2\text{ase}$ : **a**:  $\text{DvMF-}[\text{NiFe}]$ ; **b**:  $\text{DvH-}[\text{NiFeSe}]$ ) and  $\text{Py}_2\text{Ox}$ /HRP-carbon cloth based biocathodes (**b** and **d**) under turnover (red lines) and non-turnover (black lines) conditions before (solid lines) and after (dashed lines) BFC evaluation as depicted in Figure 5 in the main text (two-compartment configuration). **a** and **c**: black lines: 100 % Ar, red lines: 100 %  $\text{H}_2$ . **b** and **d**: black lines: 100 % Ar, 1 mM glucose; red lines: 100 %  $\text{O}_2$ , 1 mM glucose. All voltammograms were recorded in 0.1 M PB (pH 7.4) with a scan rate of  $10 \text{ mV s}^{-1}$ .

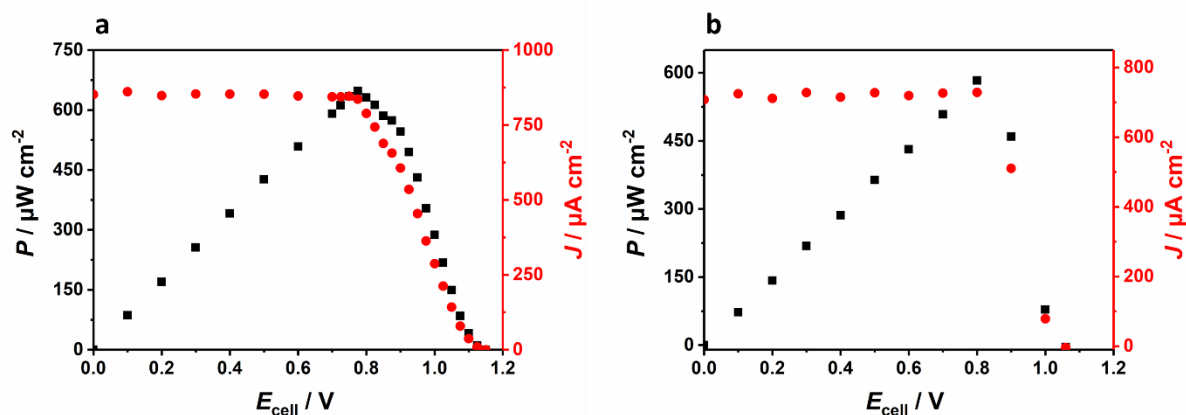

**Supplementary Figure 12:** Power curves and current densities for P(N<sub>3</sub>MA-BA-GMA)-vio/DvH-[NiFeSe]//P(SS-GMA-BA)/Py<sub>2</sub>Ox/CAT (bioanode) and Py<sub>2</sub>Ox/HRP (biocathode) BFCs in a two-compartment cell containing 0.1 M PB (pH 7.4) and 3 mM (a) or 50 mM (b) glucose (note that a higher glucose concentration does not lead to an improved performance of the BFC since the anode is limiting in the applied configuration). Characteristic data for a: OCV = 1.15 V,  $J = 830 \mu\text{A cm}^{-2}$  and  $P_{\text{max}} = 650 \mu\text{W cm}^{-2}$  at 0.78 V with; b: OCV: 1.05 V,  $J = 730 \mu\text{A cm}^{-2}$  and  $P_{\text{max}} = 580 \mu\text{W cm}^{-2}$  at 0.8 V. Gas feeds: bioanode compartment = 100 % H<sub>2</sub>/3 % Ar; biocathode compartment = 50 % O<sub>2</sub>/50 % Ar.

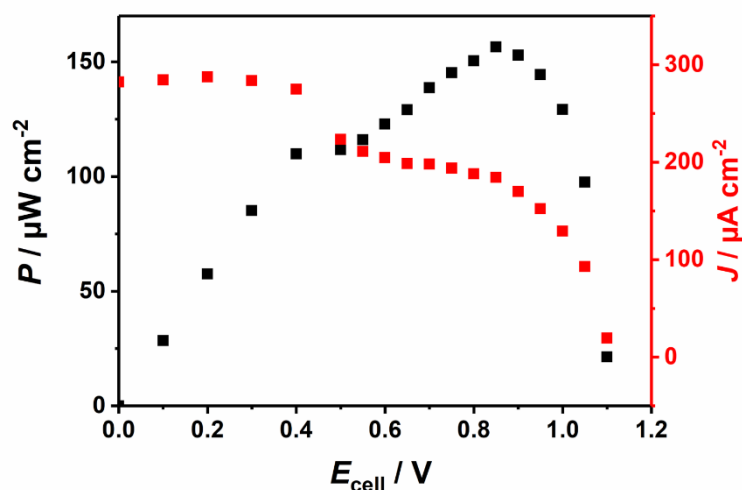

**Supplementary Figure 13:** Performance of the H<sub>2</sub>/glucose(H<sub>2</sub>O<sub>2</sub>) powered DvH-[NiFeSe]/HRP based BFC in 0.1 M PB (pH 7.4, 3 mM glucose) measured in a one-compartment cell with the polymer double-layer bioanode (P(N<sub>3</sub>MA-BA-GMA)-vio/DvH-[NiFeSe]//P(SS-GMA-BA)/Py<sub>2</sub>Ox/CAT) and a Py<sub>2</sub>Ox/HRP modified CNT/CMF-carbon cloth biocathode. Characteristics: OCV = 1.15 V;  $J = 180 \mu\text{A cm}^{-2}$  and  $P_{\text{max}} = 160 \mu\text{W cm}^{-2}$  at 0.85 V; gas feed: 97 % H<sub>2</sub>/3 % O<sub>2</sub>. The jump in  $J$  and  $P$  at 0.4 V may be attributed to a change at the cathode during the measurement that was started at OCV.

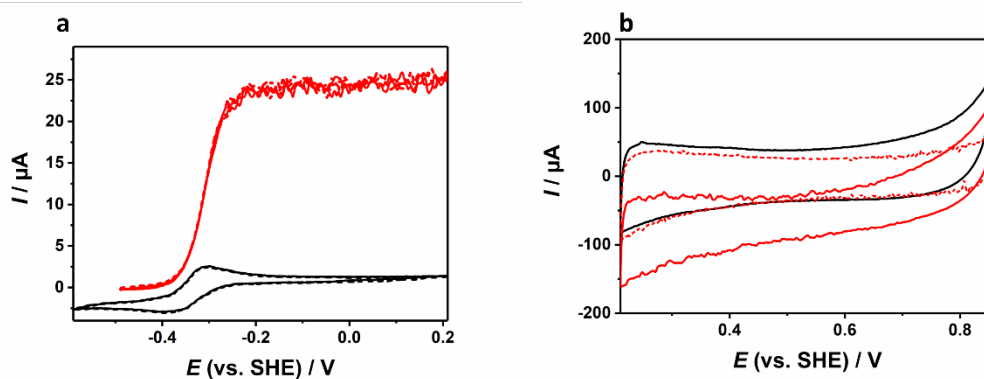

**Supplementary Figure 14:** Cyclic voltammograms recorded with a P(N<sub>3</sub>MA-BA-GMA)-*vio*/DvH-[NiFeSe]// P(SS-GMA-BA)/Py<sub>2</sub>Ox/CAT bioanode (a) and a Py<sub>2</sub>Ox/HRP-carbon cloth biocathode (b) under turnover (red lines) and non-turnover conditions before (solid lines) and after (dashed lines) the BFC test in a one-compartment cell (Supplementary Figure S13). **a:** black lines: 100 % Ar, red lines: 100 % H<sub>2</sub>. **b:** black lines: 100 % Ar, 3 mM glucose. All voltammograms were recorded in 0.1 PB (pH 7.4) with a scan rate of 10 mV s<sup>-1</sup>.

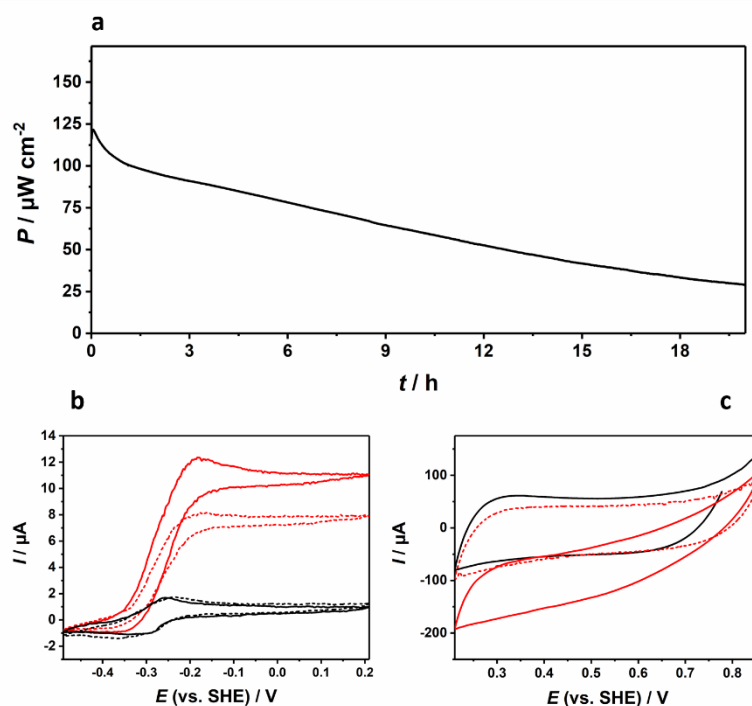

**Supplementary Figure 15:** Long term stability of a two-compartment BFC comprising a P(N<sub>3</sub>MA-BA-GMA)-*vio*/DvH-[NiFeSe]// P(SS-GMA-BA)/Py<sub>2</sub>Ox/CAT bioanode and Py<sub>2</sub>Ox/HRP biocathode in 0.1 M PB (pH 7.4) with 3 mM glucose in each compartment and with 97 % H<sub>2</sub>/3 % Ar and 50 % O<sub>2</sub>/50 % Ar bubbling to the bioanode and biocathode compartment respectively (a). Cyclic voltammograms of the bioanode (b) and the biocathode (c) were recorded in 0.1 M PB (pH 7.4) containing 3 mM glucose before (solid lines) and after (dashed lines) under non-turnover conditions (black lines, **b** and **c**: 100 % Ar) and turn-over conditions (red lines, **b**: 100 % H<sub>2</sub>, **c**: 50 % O<sub>2</sub>/50 % Ar).

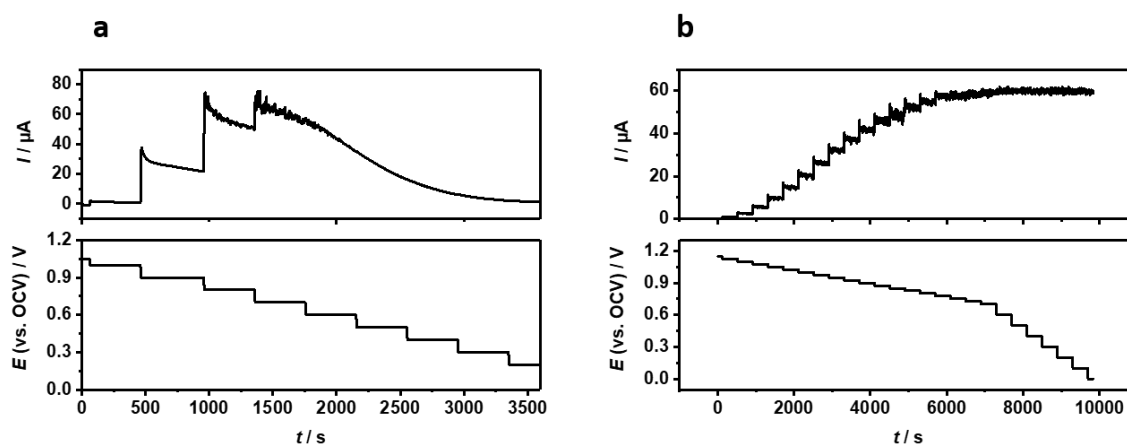

**Supplementary Figure 16:** Biofuel cell measurement in 0.1 M PB (pH 7.4) with a P(N<sub>3</sub>MA-BA-GMA)-vio/DvH-[NiFeSe]/P(SS-GMA-BA)/Py<sub>2</sub>Ox/CAT bioanode and a Py<sub>2</sub>Ox/HRP-carbon cloth biocathode assembled in a two-compartment cell. **a:** the bioanode contained an inactive catalase (H<sub>2</sub>O<sub>2</sub> that is produced by Py<sub>2</sub>Ox in the presence of O<sub>2</sub> and glucose is not removed at the bioanode). The current (top) drops to zero after ≈3000 s, while applying different loads (bottom) indicating that the formed H<sub>2</sub>O<sub>2</sub> destroys the hydrogenase and the polymer matrix (see Supplementary Figure 16). **b:** Current output for a system bearing an active catalase in the protection layer at the [NiFeSe] based bioanode (data correspond to power curve depicted in Supplementary Figure 12A). Stable steady state currents were observed for each load.

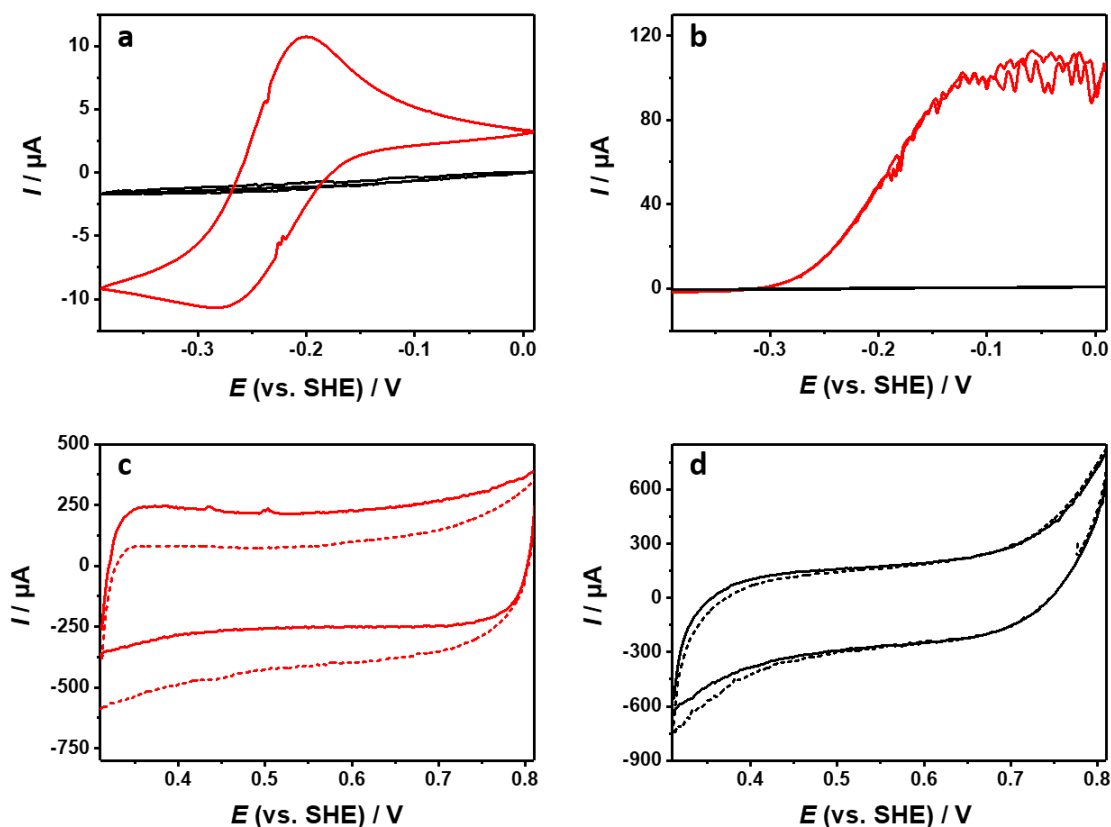

**Supplementary Figure 17:** Cyclic voltammograms recorded in 0.1 M PB (pH 7.4) with a P(N<sub>3</sub>MA-BA-GMA)-*vio*/D<sub>v</sub>H-[NiFeSe]//P(SS-GMA-BA)/Py<sub>2</sub>Ox/CAT bioanode (**a** and **b**) and a Py<sub>2</sub>Ox/HRP-carbon cloth biocathode (**c** and **d**) before (red lines) and after (black lines) a biofuel cell measurement (see Supplementary Figure 15A). The bioanode contained an inactive catalase to demonstrate the effect of H<sub>2</sub>O<sub>2</sub> on the bioanode system. **a** and **b**: Cyclic voltammograms recorded with the bioanode under argon (**a**) and H<sub>2</sub> (**b**) bubbling. **c** and **d**: Cyclic voltammograms recorded with the biocathode under argon (solid lines in **c** and **d**) and O<sub>2</sub> (dashed lines in **c** and **d**) bubbling. All voltammograms were recorded with a scan rate of 10 mV s<sup>-1</sup>.

## Supplementary References

1. Ruff, A. *et al.* Protection and Reactivation of the [NiFeSe] Hydrogenase from *Desulfovibrio vulgaris* Hildenborough under Oxidative Conditions. *ACS Energy Lett.* **2**, 964–968 (2017).
